## Minor QTLs mining through the combination of GWAS and machine learning feature selection

Wei Zhou<sup>1</sup>, Emily S. Bellis<sup>2</sup>, Jonathan Stubblefield<sup>1</sup>, Jason Causey<sup>1</sup>, Jake Qualls<sup>1</sup>, Karl Walker<sup>3</sup>, Xiuzhen Huang<sup>1\*</sup>

1. Department of Computer Science and Molecular Bioscience Program, Arkansas State University, Jonesboro, Arkansas, 72401
2. Department of Biology, The Pennsylvania State University, University Park, Pennsylvania, 16802
3. Department of Computer Science and Mathematics, University of Arkansas at Pine Bluff, Pine Bluff, Arkansas 71601

Wei Zhou, Department of Computer Science, Arkansas State University, Jonesboro Arkansas, 72401, Email:

[wzhou@astate.edu](mailto:wzhou@astate.edu)

Emily S. Bellis, Department of Biology, The Pennsylvania State University, University Park, Pennsylvania, 16802, Email: [ezb336@psu.edu](mailto:ezb336@psu.edu)

Jonathan Stubblefield, Department of Computer Science and MBS Program, Arkansas State University, Jonesboro, Arkansas, 72401, Email: [jstubblefield@astate.edu](mailto:jstubblefield@astate.edu)

Jason Causey, Department of Computer Science, Arkansas State University, Jonesboro, Arkansas, 72401, Email: [jcausey@astate.edu](mailto:jcausey@astate.edu)

Jake Qualls, Department of Computer Science, Arkansas State University, Jonesboro, Arkansas, 72401, Email: [jqualls@astate.edu](mailto:jqualls@astate.edu)

Karl Walker, Department of Computer Science and Mathematics, University of Arkansas at Pine Bluff, 1200 North University Drive, Pine Bluff, AR 71601, Email: [walker@uapb.edu](mailto:walker@uapb.edu)

\*Corresponding author

Dr. Xiuzhen Huang

Department of Computer Science and Molecular Bioscience Program, Arkansas State University, Jonesboro, Arkansas, 72401

Email: [xhuang@astate.edu](mailto:xhuang@astate.edu)

Telephone: +1-870-680-8116

1 **Abstract**

2 **Introduction:** Minor QTLs mining has a very important role in genomic selection, pathway analysis and  
3 trait development in agricultural and biological research. Since most individual loci contribute little to  
4 complex trait variations, it remains a challenge for traditional statistical methods to identify minor QTLs  
5 with subtle phenotypic effects. Here we applied a new framework which combined the GWAS analysis  
6 and machine learning feature selection to explore new ways for the study of minor QTLs mining.

7 **Results:** We studied the soybean branching trait with the 2,137 accessions from soybean (*Glycine max*)  
8 diversity panel, which was sequenced by 50k SNP chips with 42,080 valid SNPs. First as a baseline  
9 study, we conducted the GWAS GAPIT analysis, and we found that only one SNP marker significantly  
10 associated with soybean branching was identified. We then combined the GWAS analysis and feature  
11 importance analysis with Random Forest score analysis and permutation analysis. Our analysis results  
12 showed that there are 36,077 features (SNPs) identified by Random Forest score analysis, and 2,098  
13 features (SNPs) identified by permutation analysis. In total, there are 1,770 features (SNPs) confirmed by  
14 both of the Random Forest score analysis and the permutation analysis. Based on our analysis, 328  
15 branching development related genes were identified. A further analysis on GO (gene ontology) term  
16 enrichment were applied on these 328 genes. And the gene location and gene expression of these  
17 identified genes were provided.

18 **Conclusions:** We find that the combined analysis with GWAS and machine learning feature selection  
19 shows significant identification power for minor QTLs mining. The presented research results on minor  
20 QTLs mining will help understand the biological activities that lie between genotype and phenotype in  
21 terms of causal networks of interacting genes. This study will potentially contribute to effective genomic  
22 selection in plant breeding and help broaden the way of molecular breeding in plants.

23 **Keywords:** Machine learning, Minor QTLs, GWAS, Feature selection

24

## 25 **Introduction**

26           In molecular genetics research, a remaining challenge in quantitative trait studies is the efficient  
27 mapping of minor quantitative trait loci (QTLs) to identify causative genes and understand the genetic  
28 basis of variation in quantitative traits [1]. Because the subtle influence on the phenotype of minor QTLs  
29 is easily masked by epistasis [2] and gene-environment interactions [3], minor QTLs are more difficult to  
30 be detected and analyzed. Because of this, a large fraction of the genetic architecture of most complex  
31 traits is not well understood [4, 5, 6]. Currently, almost all of genes or QTLs that have been verified were  
32 major effect ones, and the minor effect QTLs were less investigated. Several different methods have been  
33 reported to identify minor QTLs, but many of these strategies have had poor success rates [7, 8, 9]. To  
34 improve the situation, some of these studies were based on expensive experimental data from large  
35 populations. For example, Baobao et al., demonstrated a method for mapping of minor effect QTLs in  
36 maize by using super high density genotyping and large recombinant inbred population [10].

37           QTL-mapping algorithm based on statistical machine learning methods better estimates of QTL  
38 effects, because it eliminates the optimistic bias in the predictive performance of other QTL methods. It  
39 produces narrower peaks than other methods and hence identifies QTLs with greater precision [17]. Two  
40 machine-learning algorithms (Random Forest and boosting) have been used to analyze discrete traits in a  
41 genome-wide prediction context. It was found out that Random Forest and boosting do not need an  
42 inheritance specification model and may account for non-additive effects without increasing the number  
43 of covariates in the model or the computing time [18]. This study shows some advantages in the use of  
44 machine learning methods to analyze discrete traits in genome-wide prediction. Random Forest was  
45 shown to outperform other methods in the field datasets, with better classification performance within and  
46 across datasets. Even when tested with the main QTLs for several traits in different chromosomes,  
47 Random Forest was able to identify them, but it failed to detect significant associations when the variance  
48 explained by the QTL is low [19].

49 Besides physical QTLs mapping, machine learning methods are also used on eQTL(Expression  
50 quantitative trait loci) Mapping. By using combinations of methods, an approach that relies on Random  
51 Forests and LASSO was developed and it achieved a much higher average precision at the cost of slightly  
52 lower average sensitivity [20]. It is observed that when combined Random Forest and other modeling  
53 techniques, it almost always performed better than their constituent methods [21, 22]. It is observed that  
54 Random Forests map eQTL are to be validated by independent data, when compared to competing multi-  
55 locus and legacy eQTL mapping methods [20].

56 Genome-wide association studies (GWAS) is considered to be a powerful approach for dissecting  
57 complex traits [23,24,25] and has been widely applied for the study of many plants, such as *Arabidopsis*,  
58 rice and maize [26, 27, 28, 29, 30, 31]. In soybean, the evaluation of several specific agronomic traits,  
59 including seed protein and oil concentration [32, 33], cyst nematode resistance [34, 35], and flowering  
60 time [36] were conducted through GWAS. Plant architecture related traits (PATs) are of great importance  
61 for soybean and many crops. Studies in past decades indicated that PATs are mainly affected by minor  
62 effect quantitative traits loci (QTLs), especially as reflected in the Nested Association Mapping (NAM)  
63 population [37, 38, 39].

64 From these previous studies, however, minor QTLs are hard to be detected mainly because their  
65 contribution is subtle. It is challenging for current statistical methods to detect them. For example, most of  
66 statistic methods are based on the variance analysis, such as ANOVA, and they usually need a larger  
67 population size to detect minor QTLs.

68 In this study, with soybean branching as the focused trait, we combined the GWAS analysis and  
69 machine learning feature selection, to explore the application of a new analysis framework in minor QTLs  
70 mining in plants. As a result, we identified 328 minor genes and 1770 effective SNP markers related to  
71 soybean branching development. Our analysis results with the new framework for minor QTLs mining  
72 would benefit the genomic selection, the pathway analysis and organism development research.

73 **Methods:**

74 **1. Dataset**

75 The original genotypic data is from soybase data bank : <https://soybase.org/snps/>. The SoySNP50K  
76 iSelect BeadChip has been used to genotype the USDA Soybean Germplasm Collection [46]. The  
77 complete data set for 20,087 G. max accessions genotyped with 42,509 SNPs is available.  
78 Soybean accessions and phenotypic data used in this study were obtained from the USDA Soybean  
79 Germplasm Collection (<http://www.ars-grin.gov/npgs/>). Branching phenotype data was extracted and  
80 used for analysis. Missing data and SNPs with minor allele frequencies below 0.1 were excluded, leaving  
81 42,080 SNPs for GWAS.

82 **2. Genome wide association study (GWAS)**

83 Association analysis and estimation of each SNP effect was implemented in GAPIT software (version 2)  
84 [47]. The regression linear model (GLM), and the mixed linear model (MLM) methods were used as  
85 described by Tang et al. [45]. Default parameters of the SUPER model were used: `sangwich.top =`  
86 `"MLM,"` `sangwich.bottom = "SUPER,"` `LD = 0.1`. The significant P-value cut-off was set as  $p = 3.45e-07$ ,  
87 equivalent to  $\alpha$  level of 0.05 after Bonferroni correction. The efficient mixed-model association with  
88 corrections for kinship and population structure was applied. Three PCs generated from GAPIT were  
89 included as covariates. The SNPs with a minor allele frequency (MAF) higher than 0.01 were used to  
90 estimate the population structure and the kinship. Only SNPs with a MAF higher than 0.1 were used for  
91 association tests. The cutoff of significant association was a False Discovery Rate (FDR) adjusted P-value  
92 less than 0.1 using the Benjamini and Hochberg procedure to control for multiple testing. Significant  
93 SNPs were defined if showing a minus  $\log_{10}$  - transformed  $P \geq 3$ . SNPs with a genetic distance less  
94 than 2 cM were considered to be in a LD extension block and belong to the same SNP cluster.

95 **3. Data preprocessing**

96 In machine learning feature selection analysis, all of nucleotides in genotype data was added the rs  
97 (Reference SNP cluster ID) information and transformed as rs + nucleotide (Sup\_Table7). The whole  
98 dataset was divided into 11 subsets based on different P-value levels for a further analysis in machine

99 learning models. The genotype data used in regression and feature importance analysis were encoded by  
100 OneHotEncoder after labelencoding.

#### 101 **4. Feature importance analysis**

102 Feature importance analysis explains what features have the biggest impact on predictions in testing  
103 model. Permutation importance is a kind of global model-agnostic method and calculated after a model  
104 has been fitted. Compared to most other approaches, permutation importance is fast to calculate and  
105 widely used. Random forest is one of the most effective machine learning models for predictive analytics  
106 capable of performing both regression and classification tasks and able to capture non-linear interaction  
107 between the features and the target. It is very good at handling categorical features with fewer than  
108 hundreds of categories [49]. The character of permutation importance consists with the properties we  
109 would want a feature importance measure to have. In this research we applied the random regressor in  
110 permutation importance analysis and Random Forest score analysis for all of 2137 samples and 42080  
111 features (SNPs).

#### 112 **5. Gene Ontology analysis**

113 SNPs identified by feature importance analysis were searched in SoyBase data site  
114 (<https://soybase.org/snps/>) by rs number. And the flank sequence of corresponding SNP was used to  
115 BLAST in Glycine max Genome DB database (<http://www.plantgdb.org/GmGDB/>) for confirmation.  
116 The gene names which SNPs hit to the same location (including CDS, UTR and intron) were collected for  
117 GO (gene ontology) analysis. All the genes identified by BLAST were analyzed by GO term enrichment  
118 tool at SoyBase website ([https://soybase.org/goslimgraphic\\_v2/dashboard.php](https://soybase.org/goslimgraphic_v2/dashboard.php)). The GO enrichment  
119 information, related charts and gene location map were generated by GO term enrichment tool at SoyBase  
120 website.

### 121 **Results:**

#### 122 **1. Genome Wide Association Study (GWAS) for soybean branching**

123 A genome-wide association study (GWAS) of soybean branching was conducted with 42,080  
124 SNP markers in the GAPIT (Genome Association and Prediction Integrated Tool) software using a mixed

125 - linear model (MLM). 3541 SNP markers with P-value less than 1.0 were identified. Among these 3541  
126 markers, there are 18 markers with P-value less than 0.005, 32 markers with P-value less than 0.01 and  
127 161 makers with P-value less than 0.05(Table 1. and Sup\_Table1.). Associations between phenotypes and  
128 genetic markers are displayed as Manhattan plots (Fig. 1) and (Sup\_Table1). P-values were displayed in  
129 negative log scale with base of 10 ( $-\log_{10}(P)$ ) against the physical map positions of genetic markers. We  
130 set a threshold of  $-\log_{10}(0.1/42080) = 5.624$  (42080 is the SNP marker numbers) to identify SNPs  
131 significantly associated with a trait. In total of 161 which P-value is less than 0.05, only SNP marker  
132 ss715607451 were significantly ( $-\log_{10}(p) = 9.524328812$ ) associated with soybean branching trait.  
133 Marker ss715632223 and ss715613636 with  $\log_{10}(p)$  value at 4.634512015 and 4.554395797  
134 respectively, are near to the threshold but not reach it (Fig. 1; Sup\_Table1). In other words, by  
135 the GAPIT analysis, only one SNP marker significantly associated with soybean branching was  
136 identified. We also BLAST the 18 SNPs which P-value less than 0.005 in Soybase and five  
137 annotated genes are found (Table 1), but none of them is reported as branching related.

## 138 **2. Feature importance analysis**

139 Please refer to Fig. 3 for a summary chart of our feature importance analysis. In the following we  
140 give the details of our analysis results.

141 In general, feature importance analysis is based on the understanding how the features in the  
142 testing model contribute to the prediction model. Feature importance includes local model-agnostic  
143 feature importance and global model-agnostic feature importance. Since local measures focus on the  
144 contribution of features for a specific prediction, whereas global measures take all predictions into  
145 account. Here we applied permutation feature importance, a global model-agnostic approach, with the  
146 Random Forest algorithm as the core. After evaluating the performance of the models, we permuted the  
147 values of a feature of interest and re-evaluate the model performance. The average reduction in impurity  
148 across all trees in the forest due to each feature was computed.

149 Our results showed that there are 974 features in total with the weight values above zero. Among  
150 them, 971 features (SNPs) have weights bigger than  $1E-06$ , 952 features (SNPs) in total have weights  
151 bigger than  $1E-05$  and 872 features (SNPs) have weights bigger than 0.0001(Sup\_Table2.). Our results  
152 also showed that there are 1124 features in total with negative weight values. Among them, 1107 features  
153 (SNPs) have weights smaller than  $-1E-05$ , 939 features (SNPs) have weights smaller than  $1E-04$   
154 (Sup\_Table2.). There are 39982 features with weight zero in the Random Forest regression model, and  
155 these features account for around 95.014% of the total number of features (SNPs) (Sup\_Table2.). Table 2  
156 showed the top 20 features with higher importance in both the positive side and negative side.

157 Besides the permutation feature importance, the feature importance was also computed by feature  
158 scores. The computation of feature scores was implemented by the Random Forest algorithm. Our results  
159 showed that there are 36077 features in total got a score bigger than  $1E-07$ . Among them, 33121 features  
160 (SNPs) got a score bigger than  $1E-06$ , 19735 features (SNPs) got a score bigger than  $1E-05$ , and 1472  
161 features (SNPs) got a score bigger than 0.0001. A total of 6003 features got a score zero, and these  
162 features accounts for 12.466% of the total features (SNPs) (Table 2, Sup\_Table3).

### 163 **3. Comparison of different methods for feature importance analysis**

164 As mentioned in above, there were 36077 features (SNPs) identified by Random Forest score  
165 analysis and 974 features (SNPs) in total had weight value above zero identified by permutation analysis.  
166 Among these 974 positive features (SNPs), there were 806 features (SNPs) confirmed by Random Forest  
167 score analysis. There were 1124 features (SNPs) in total got negative weight values identified by  
168 permutation analysis. Among these 1124 negative features (SNPs), there were 964 features confirmed by  
169 Random Forest score analysis. In total, there were 1770 features (SNPs) confirmed by both of Random  
170 Forest score analysis ad permutation analysis. Among these 1770 features (SNPs), there were 146 features  
171 (SNPs) with P-value  $< 1$  (69 positives and 77 negatives) (Fig. 2, Sup\_Table4.).

172 To validate our feature importance analysis results, all 2137 samples characterized with 1170  
173 identified SNPs were applied on the Elastic net regression analysis. Our results showed that the RMSE  
174 (root mean square error) was 0.2813 and the  $R^2$  value was 0.741. Compare to the Elastic net analysis on



175 data subsets from the GAPIT analysis, the accurate level close to the data set those with P-value <1. For  
176 SNPs with P-value less than 1 in the GAPIT analysis, the RMSE value was 0.2601 and the R<sup>2</sup> value was  
177 0.7810, but there were 3451 features (SNPs) applied (Table 2). In other words, our results showed that  
178 1770 features (SNPs) from feature selection could reach the same accuracy as the 3451 features (SNPs)  
179 with P-value less than 1.0. The analysis showed that feature importance analysis could help lower the  
180 feature size and increase the computation efficiency.

181         Based on the above analysis, we searched all 1170 SNPs which were confirmed by both of  
182 Random Forest score and Permutation analysis in soybean genome. We found that 328 SNPs hit the  
183 annotated genes (Sup\_Table4). To identify biological processes these 328 genes participate in, we further  
184 applied the GO (gene ontology) term enrichment analysis for all of them. Our result showed that the  
185 functional group for biological process, cellular component and molecular function were highly enriched  
186 by most of these 328 genes (Fig. 3, 4, and 5, Sup\_Table5). In biological process, 66 genes (times) were  
187 classified into 16 GO term classes and 14 genes had no specific GO term to assign (Fig. 3, Sup\_Table5).  
188 In cellular component class, 388 genes (times) were classified into 18 GO classes and 14 genes had no  
189 specific GO term to assign (Fig. 4, Sup\_Table5). In molecular function class, 264 genes (times) were  
190 classified into 17 GO classes and 14 genes had no specific GO term to assign (Fig. 5, Sup\_Table5). As is  
191 common with GO analysis, some genes were classified differently under different GO terms  
192 (Sup\_Table5).

193         Gene location mapping results showed that all of these 328 genes are scattered on chromosome 1  
194 to chromosome 18. There were no branching related genes located in chromosome 19 and chromosome  
195 20 (Fig. 6). The inquiry term “branching” was searched in Soybase and 35 genes were found  
196 (Sup\_Table4). To make a comparison, the location of these 35 genes were also marked on Fig. 6. The  
197 gene expression information of all 328 genes identified in this research were searched against Soybase for  
198 a further analysis (Sup\_Table 6).

## 199 **Discussion:**

### 200 **1. Minor QTLs and genomic selection**

201 Genomic selection is a marker-assisted selection approach to enhance quantitative traits in  
202 breeding population, in which whole genome SNPs (single-nucleotide polymorphisms) markers can be  
203 used to predict breeding values. Genomic selection has been proved to increase breeding efficiency in  
204 both plant and animal breeding, such as dairy cattle, pig, rice and soybean [41]. To get an accurate  
205 prediction in genomic selection, we need a better understanding of the population of SNP makers and the  
206 contribution of each markers. In the last decade, efforts of global international collaborations have  
207 revealed numerous loci that influence traits development in different organism by genotyping and  
208 phenotyping very large cohorts of individuals. However, the effects of single alleles explain only a small  
209 portion of the heritable variability [42]. Although some traits loci are found, these loci alone do not point  
210 to the underlying mechanism responsible for the association, which is due to complex gene interactions in  
211 biological activities. To identify genes and pathways responsible for variation in quantitative traits, it is  
212 still a central challenge of modern genetics.

213 Plant breeding is the process of pyramiding favorable alleles. The minor effect QTLs have much  
214 more importance in molecular breeding and commercial breeding since the enrichment of minor alleles  
215 can enhance the control accuracy of phenotype performance [43]. In this research, we applied a new  
216 framework which combined the GWAS analysis and different feature selection methods to explore minor  
217 QTLs/alleles and their importance in soybean branching. Compare to the P-value method in GWAS  
218 analysis, the feature importance analysis we used in this research explored 36077 features in total with a  
219 score higher than  $1E-07$ , which is about ten times as the number of the features identified in GWAS  
220 analysis with P-value less than 1.0. Based on the Permutation feature importance analysis, we explored  
221 974 features with positive effects on soybean branching development and 1124 features with negative  
222 effects on soybean branching development (Table 2 and Sup\_Table2). Either in linkage mapping or in  
223 association mapping, it is difficult to find the QTLs which have negative contribution to a trait, even we  
224 all know there are negative QTLs/alleles involved in all biological activities. From our analysis and  
225 testing results, the new framework we used in this research is superior to the traditional P-value based  
226 methods in molecular genetics analysis. Actually, in GWAS analysis, there is only one SNP

227 (ss715607451) above the threshold, unfortunately, this SNP does not hit on any gene. And the BLAST  
228 results of the 18 SNPs with P-value less than 0.005 in Soybase shows five annotated genes (Table 1), but  
229 none of them is reported as branching related. All of these information are very important to genomic  
230 selection and could lead to an accurate prediction in genomic selection a further study in future.

## 231 **2. Feature importance analysis and its applications**

232 In this research, we applied three kind of feature importance analysis, permuted feature  
233 importance, feature importance scoring and P-value analysis through GAPIT. We employed the Random  
234 Forest regression algorithm in permuted feature importance and feature importance scoring analysis. It is  
235 reported that the feature importance based methods are applicable if we are going to use a tree-based  
236 model for making predictions [44]. Random Forest is one of the most effective machine learning models  
237 for predictive analytics capable of performing both regression and classification tasks and able to capture  
238 non-linear interaction between the features and the target [45]. In random Forest, features that tend to split  
239 nodes closer to the root of a tree will result in a larger importance value. Node splits based on this feature  
240 on average result in a large decrease of node impurity. Permutation feature importance is a model-  
241 agnostic approach and is calculated after a model has been fitted. The values of a feature of interest and  
242 reevaluate model performance is permuted after evaluating the performance of model. The observed  
243 mean decrease in performance indicates feature importance. The performance decrease can be compared  
244 on the test set as well as the training set. Only the latter will tell us something about generalizable feature  
245 importance.

246 As we mentioned above, one of the biggest problems facing GWAS analysis is difficult to detect  
247 quantitative traits which controlled by multiple genes, Association mapping and bi-parent mapping good  
248 for major QTLs but not minor QTLs, Minor QTLs are important for quantitative traits but hard to be  
249 detected by traditional genetic research, Machine learning methods open a door for minor QTLs mining,  
250 special for non-model organisms with less research basis. Our results showed that the new framework  
251 displays much powerful ability in minor QTLs mining than conventional analysis methods. We can

252 expect many discoveries will be made through applications of different machine learning methods to  
253 genomics data, particularly in genomic selection research.

254 **Conclusions:**

255 Accurate prediction of genomic breeding values is a central challenge to contemporary plant and  
256 animal breeders. Minor QTLs play very important roles in this procedure, but we know little about the  
257 minor QTLs in most traits' development. To understand how many genes and which genes involved in  
258 the trait's development is the prerequisites of breeding prediction. In this research, we combined the  
259 GWAS analysis and feature selection with machine learning methods, and explored the new framework in  
260 minor QTLs mining. The framework provides a way for finding minor QTLs and better estimates of the  
261 QTL effects supportable by the data. Unlike QTL mapping through linkage mapping, this framework does  
262 not require a genetic map. It is therefore applicable to any species or population. This research on minor  
263 QTLs mining will contribute to trait's development and gene pathway analysis in further studies.

264

265

266 **Abbreviations**

267 SNPs: single-nucleotide polymorphisms

268 GWAS: genome-wide association study

269 CDS: coding region sequence

270 UTR: untranslated region

271 GO: gene ontology

272 BLAST: Basic Local Alignment Search Tool

273

274 **Declarations**

275 **Acknowledgments**

276 We thank our campus research colleagues for their helpful suggestions, insightful comments and  
277 discussions on this research.

278 **Funding**

279 This work was partially supported by National Institute of Health NCI grant U01CA187013, and National  
280 Science Foundation with grant number 1452211, 1553680, and 1723529, National Institute of Health  
281 grant R01LM012601, as well as partially supported by National Institute of Health grant from the  
282 National Institute of General Medical Sciences (P20GM103429).

283 **Availability of data and materials**

284 The original dataset is publically available. And our intermediate analysis results and code used for  
285 analysis with this study are available from the corresponding author upon request.

286 **Conflict of Interest Statement**

287 The authors declare that the research was conducted in the absence of any commercial or financial  
288 relationships that could be construed as a potential conflict of interest.

289 **Authors' contributions**

290 WZ participated in the statistical analyses, data processing and writing the manuscript. XH participated in  
291 conceiving the presented idea, development of the software, discussions of the results, and drafted the  
292 manuscript. EB, JS, JC, JQ and KW collaborated with statistical analyses, data processing, interpretation,  
293 data analysis support, and writing of the manuscript. All the authors approved the manuscript.

294 **Ethics approval and consent to participate**

295 NA

296 **Consent for publication**

297 NA

298 **Competing interests**

299 The authors declare that they have no competing interests.

300 **References**

- 301 1. Mackay TF, Stone EA, Ayroles JF. The genetics of quantitative traits: challenges and prospects. *Nature*  
302 *Reviews Genetics*. 2009; 10:565.
- 303 2. Carlborg O, Haley CS. Epistasis: too often neglected in complex trait studies? *Nature reviews Genetics*  
304 2004; 5: 618–25.
- 305 3. Smith EN, Kruglyak L. Gene–environment interaction in yeast gene expression. *PLoS biology*. 2008;  
306 6:e83.
- 307 4. Mackay T. F. The genetic architecture of quantitative traits. *Annu. Rev. Genet.* 2001; 35: 303–339.
- 308 5. Allen HL, Estrada K, Lettre G, Berndt SI, Weedon MN, Rivadeneira F, Willer CJ, Jackson AU,  
309 Vedantam S, Raychaudhuri S, Ferreira T. Hundreds of variants clustered in genomic loci and biological  
310 pathways affect human height. *Nature*. 2010; 467: 832–838.
- 311 6. Yang J, Manolio TA, Pasquale LR, Boerwinkle E, Caporaso N, Cunningham JM, De Andrade M,  
312 Feenstra B, Feingold E, Hayes MG, Hill WG. Genome partitioning of genetic variation for complex traits  
313 using common SNPs. *Nature genetics*. 2011; 43: 519–525.
- 314 7. Flint J, Valdar W, Shifman S, Mott R. Strategies for mapping and cloning quantitative trait genes in  
315 rodents. *Nature Reviews Genetics*. 2005; 6: 271–286.
- 316 8. Darvasi A. Experimental strategies for the genetic dissection of complex traits in animal models.  
317 *Nature genetics*. 1998; 18: 19–24.
- 318 9. Satagopan JM, Sen S, Churchill GA. Sequential quantitative trait locus mapping in experimental  
319 crosses. *Statistical applications in genetics and molecular biology*. 2007;6(1).
- 320 10. Wang B, Liu H, Liu Z, Dong X, Guo J, Li W, Chen J, Gao C, Zhu Y, Zheng X, Chen Z. Identification  
321 of minor effect QTLs for plant architecture related traits using super high density genotyping and large  
322 recombinant inbred population in maize (*Zea mays*). *BMC plant biology*. 2018;18:17.
- 323 11. Ratner B. *Statistical and machine-learning data mining: Techniques for better predictive modeling and*  
324 *analysis of big data*. Chapman and Hall/CRC; 2017 Jul 12.

- 325 12. Libbrecht MW, Noble WS. Machine learning applications in genetics and genomics. *Nature Reviews*  
326 *Genetics*. 2015; 16:321.
- 327 13. Berman JJ. Principles of big data: preparing, sharing, and analyzing complex information. Newnes;  
328 2013.
- 329 14. Bassel GW, Glaab E, Marquez J, Holdsworth MJ, Bacardit J. Functional network construction in  
330 *Arabidopsis* using rule-based machine learning on large-scale data sets. *The Plant Cell*. 2011; 23:3101-16.
- 331 15. Bassel GW, Gaudinier A, Brady SM, Hennig L, Rhee SY, De Smet I. Systems analysis of plant  
332 functional, transcriptional, physical interaction, and metabolic networks. *The Plant Cell*. 2012; 24:3859-  
333 75
- 334 16. Long N, Gianola D, Rosa GJ, Weigel KA, Avendano S. Machine learning classification procedure for  
335 selecting SNPs in genomic selection: application to early mortality in broilers. *Journal of animal breeding*  
336 *and genetics*. 2007; 124:377-89.
- 337 17. Bedo J, Wenzl P, Kowalczyk A, Kilian A. Precision-mapping and statistical validation of quantitative  
338 trait loci by machine learning. *BMC genetics*. 2008; 9:35.
- 339 18. González-Recio O, Forni S. Genome-wide prediction of discrete traits using Bayesian regressions and  
340 machine learning. *Genetics Selection Evolution*. 2011; 43:7.
- 341 19. Minozzi G, Pedretti A, Biffani S, Nicolazzi EL, Stella A. Genome wide association analysis of the  
342 16th QTL-MAS Workshop dataset using the Random Forest machine learning approach. In *BMC*  
343 *proceedings 2014 Oct (Vol. 8, No. 5, p. S4)*. BioMed Central.
- 344 20. Michaelson JJ, Alberts R, Schughart K, Beyer A. Data-driven assessment of eQTL mapping methods.  
345 *BMC genomics*. 2010; 11:502.
- 346 21. Hastie T, Tibshirani R, Friedman JH. *The elements of statistical learning: data mining, inference, and*  
347 *prediction*. New York: Springer: 2009.
- 348 22. Ackermann M, Clément-Ziza M, Michaelson JJ, Beyer A. Teamwork: improved eQTL mapping using  
349 combinations of machine learning methods. *PloS one*. 2012; 24:1-8



- 350 23. Korte A, Farlow A. The advantages and limitations of trait analysis with GWAS: a review. *Plant*  
351 *Methods*. 2013; 9:29–37.
- 352 24. Wallace GJ, Zhang X, Beyene Y, Semagn K, Olsen M, Prasanna BM, Buckler ES. Genome-wide  
353 Association for Plant Height and Flowering Time across 15 tropical maize populations under managed  
354 drought stress and well-watered conditions in sub-Saharan Africa. *Crop Sci*. 2016; 56(5):2365–2378.
- 355 25. Contreras-Soto RI, Mora F, de Oliveira MAR, Higashi W, Scapim CA, Schuster I. A genome-wide  
356 association study for agronomic traits in soybean using SNP markers and SNP based haplotype analysis.  
357 *PLoS One*. 2017; 12(2).
- 358 26. Atwell S, Huang YS, Vilhjalmsjon BJ, Willems G, Horton M, Li Y, et al. Genome-wide association  
359 study of 107 phenotypes in *Arabidopsis thaliana* inbred lines. *Nature*. 2010; 465:627–31.
- 360 27. Huang X, Wei X, Sang T, Zhao Q, Feng Q, Zhao Y, et al. Genome-wide association studies of 14  
361 agronomic traits in rice landraces. *Nat Genet*. 2010; 42:961–7.
- 362 28. Huang X, Zhao Y, Wei X, Li C, Wang A, Zhao Q, et al. Genome-wide association study of flowering  
363 time and grain yield traits in a worldwide collection of rice germplasm. *Nat Genet*. 2012; 44:32–9.
- 364 29. Chen W, Gao Y, Xie W, Gong L, Lu K, Wang W, et al. Genome-wide association analyses provide  
365 genetic and biochemical insights into natural variation in rice metabolism. *Nat Genet*. 2014; 46:714–21.
- 366 30. Buckler ES, Holland JB, Bradbury PJ, Acharya CB, Brown PJ, Browne C, et al. The genetic  
367 architecture of maize flowering time. *Science*. 2009; 325:714–8.
- 368 31. Li H, Peng Z, Yang X, Wang W, Fu J, Wang J, et al. Genome-wide association study dissects the  
369 genetic architecture of oil biosynthesis in maize kernels. *Nat Genet*. 2013; 45:43–50.
- 370 32. Hwang EY, Song Q, Jia G, Specht JE, Hyten DL, Costa J, et al. A genome-wide association study of  
371 seed protein and oil content in soybean. *BMC Genomics*. 2014; 15:1–12.
- 372 33. Bandillo N, Jarquin D, Song QJ, Nelson R, Cregan P, Specht J, et al. A population structure and  
373 genome-wide association analysis on the USDA soybean germplasm collection. *Plant Genome*. 2015;  
374 8:1–13.

- 375 34. Han Y, Zhao X, Cao G, Wang Y, Li Y, Liu D, et al. Genetic characteristics of soybean resistance to  
376 HG type 0 and HG type 1.2.3.5.7 of the cyst nematode analyzed by genome-wide association mapping.  
377 BMC Genomics. 2015; 16:598–608.
- 378 35. Vuong TD, Sonah H, Meinhardt CG, Deshmukh R, Kadam S, Nelson RL, et al. Genetic architecture  
379 of cyst nematode resistance revealed by genome-wide association study in soybean. BMC Genomics.  
380 2015; 16:593–605.
- 381 36. Zhang J, Song Q, Cregan PB, Nelson RL, Wang X, Wu J, et al. Genome-wide association study for  
382 flowering time, maturity dates and plant height in early maturing soybean (*Glycine max*) germplasm.  
383 BMC Genomics. 2015; 16:217–27.
- 384 37. Brown PJ, Upadyayula N, Mahone GS, Tian F, Bradbury PJ, Myles S, Holland JB, Flint-Garcia S,  
385 McMullen MD, Buckler ES, Rocheford TR. Distinct genetic architectures for male and female  
386 inflorescence traits of maize. PLoS genetics. 2011; 7(11).
- 387 38. Tian F, Bradbury PJ, Brown PJ, Hung H, Sun Q, Flint-Garcia S, Rocheford TR, McMullen MD,  
388 Holland JB, Buckler ES. Genome-wide association study of leaf architecture in the maize nested  
389 association mapping population. Nat Genet. 2011; 43(2):159–162.
- 390 39. Peiffer JA, Romay MC, Gore MA, Flint-Garcia SA, Zhang Z, Millard MJ, Gardner CAC, McMullen  
391 MD, Holland JB, Bradbury PJ, et al. The genetic architecture of maize height. Genetics. 2014;  
392 196(4):1337–1356.
- 393 40. Zou H, Hastie T. Regularization and variable selection via the elastic net. Journal of the royal  
394 statistical society: series B (statistical methodology). 2005; 67:301-20.
- 395 41. Shamshad M, Sharma A. The Usage of Genomic Selection Strategy in Plant Breeding. InNext  
396 Generation Plant Breeding 2018 Nov 5. IntechOpen.
- 397 42. Manolio TA, Collins FS, Cox NJ, Goldstein DB, Hindorff LA, Hunter DJ, McCarthy MI, Ramos EM,  
398 Cardon LR, Chakravarti A, Cho JH. Finding the missing heritability of complex diseases. Nature. 2009;  
399 461: 747–753.

- 400 43. Parts L, Cubillos FA, Warringer J, Jain K, Salinas F, Bumpstead SJ, Molin M, Zia A, Simpson JT,  
401 Quail MA, Moses A. Revealing the genetic structure of a trait by sequencing a population under selection.  
402 Genome research. 2011; 21(7):1131-8.
- 403 44. Cao DS, Xu QS, Liang YZ, Chen X, Li HD. Automatic feature subset selection for decision tree-  
404 based ensemble methods in the prediction of bioactivity. Chemometrics and Intelligent Laboratory  
405 Systems. 2010; 103:129-36.
- 406 45. Voyant C, Notton G, Kalogirou S, Nivet ML, Paoli C, Motte F, Fouilloy A. Machine learning  
407 methods for solar radiation forecasting: A review. Renewable Energy. 2017 May 1;105:569-82.
- 408 46. Song Q, Hyten DL, Jia G, Quigley CV, Fickus EW, Nelson RL, Cregan PB. Fingerprinting soybean  
409 germplasm and its utility in genomic research. G3: Genes, Genomes, Genetics. 2015 Oct 1;5(10):1999-  
410 2006.
- 411 47. Tang Y, Liu X, Wang J, Li M, Wang Q, Tian F, Su Z, Pan Y, Liu D, Lipka AE, Buckler ES. GAPIT  
412 version 2: an enhanced integrated tool for genomic association and prediction. The plant genome. 2016;  
413 9(2).
- 414 48. Zou H, Hastie T. Regression shrinkage and selection via the elastic net, with applications to  
415 microarrays. JR Stat Soc Ser B. 2003; 67:301-20.
- 416 49. Zhou L, Pan S, Wang J, Vasilakos AV. Machine learning on big data: Opportunities and challenges.  
417 Neurocomputing. 2017; 237:350-61.

## Tables and table legends

**Table 1. Summary of SNP markers with P-value less than 0.005 from GWAS analysis**

| SNP         | Location      | Chr.* | Position | P.value  | RMS**    | -log10 value |
|-------------|---------------|-------|----------|----------|----------|--------------|
| ss715607451 | intergenic    | 10    | 45054553 | 2.99E-10 | 0.363021 | 9.524329     |
| ss715632223 | intergenic    | 18    | 55622046 | 2.32E-05 | 0.356302 | 4.634512     |
| ss715613636 | intergenic    | 12    | 8904870  | 2.79E-05 | 0.356195 | 4.554396     |
| ss715579744 | Glyma01g35330 | 1     | 48727937 | 0.000209 | 0.355028 | 3.679931     |
| ss715622025 | intergenic    | 15    | 46324641 | 0.000363 | 0.35471  | 3.439907     |
| ss715622023 | intergenic    | 15    | 46299552 | 0.000531 | 0.354493 | 3.275199     |
| ss715579749 | Glyma01g35370 | 1     | 48751448 | 0.000605 | 0.354419 | 3.218473     |
| ss715613329 | intergenic    | 12    | 6846229  | 0.000809 | 0.354254 | 3.092144     |
| ss715579747 | intergenic    | 1     | 48741524 | 0.000883 | 0.354204 | 3.054065     |
| ss715637835 | intergenic    | 20    | 37318170 | 0.001282 | 0.353993 | 2.892276     |
| ss715607752 | Glyma10g39840 | 10    | 48017555 | 0.001568 | 0.353879 | 2.804728     |
| ss715613193 | intergenic    | 12    | 5623543  | 0.002378 | 0.353645 | 2.623833     |
| ss715638884 | Glyma20g38610 | 20    | 47292145 | 0.002454 | 0.353628 | 2.610076     |
| ss715638808 | Glyma20g37960 | 20    | 46826697 | 0.003846 | 0.353377 | 2.414971     |
| ss715590469 | intergenic    | 5     | 30305516 | 0.003889 | 0.353371 | 2.410177     |
| ss715633540 | intergenic    | 19    | 25950203 | 0.004234 | 0.353324 | 2.373279     |
| ss715583971 | intergenic    | 2     | 8220222  | 0.004556 | 0.353283 | 2.341369     |

\*Chr. indicates chromosome number.

\*\*RMS indicates R-square of Model with SNP

Location indicates the SNPs in or out of an annotated gene.

**Table 2.** Top 20 features with higher importance from permutation analysis

| positive weight |          |          |          |          | negative weight |          |          |          |          |
|-----------------|----------|----------|----------|----------|-----------------|----------|----------|----------|----------|
| rs#             | weight   | Std**    | P-value  | score    | rs#             | weight   | Std**    | P-value  | score    |
| ss715636302     | 0.006481 | 0.000887 | 1        | 0        | ss715584181     | -0.01309 | 0.006558 | 1        | 5.19E-05 |
| ss715632046     | 0.006242 | 0.000954 | 1        | 0        | ss715606461     | -0.01298 | 0.003566 | 1        | 1.08E-05 |
| ss715586408     | 0.005429 | 0.001522 | 1        | 4.26E-05 | ss715611174     | -0.01231 | 0.008024 | 1        | 7.61E-06 |
| ss715629729     | 0.005398 | 0.00163  | 1        | 3.52E-07 | ss715601294     | -0.01182 | 0.002501 | 1        | 1.57E-05 |
| ss715639086     | 0.005334 | 0.001063 | 1        | 0        | ss715621258     | -0.01084 | 0.006296 | 1        | 2.42E-06 |
| ss715600775     | 0.0051   | 0.001249 | 1        | 1.62E-05 | ss715636617     | -0.01053 | 0.00258  | 1        | 0        |
| ss715634776     | 0.004993 | 0.000713 | 1        | 0        | ss715614457     | -0.01017 | 0.004173 | 1        | 5.59E-06 |
| ss715621250     | 0.004987 | 0.002158 | 1        | 2.42E-06 | ss715584279     | -0.00995 | 0.002648 | 1        | 5.13E-05 |
| ss715606657     | 0.004812 | 0.002458 | 0.499356 | 1.06E-05 | ss715616125     | -0.00898 | 0.001576 | 1        | 4.58E-06 |
| ss715610241     | 0.004781 | 0.001113 | 1        | 8.27E-06 | ss715638986     | -0.00891 | 0.007572 | 1        | 0        |
| ss715597582     | 0.004612 | 0.0013   | 1        | 1.97E-05 | ss715619437     | -0.00862 | 0.002983 | 1        | 3.08E-06 |
| ss715611890     | 0.004579 | 7.37E-05 | 1        | 7.16E-06 | ss715610413     | -0.00722 | 0.002548 | 0.263147 | 8.13E-06 |
| ss715632589     | 0.004394 | 0.004083 | 1        | 0        | ss715604675     | -0.00668 | 0.00313  | 1        | 1.23E-05 |
| ss715580947     | 0.004045 | 0.0068   | 1        | 8.9E-05  | ss715605467     | -0.00666 | 0.00415  | 1        | 1.17E-05 |
| ss715596598     | 0.003836 | 0.003571 | 1        | 2.09E-05 | ss715607569     | -0.00632 | 0.006535 | 1        | 9.93E-06 |
| ss715617936     | 0.003701 | 0.002292 | 0.846353 | 3.72E-06 | ss715588364     | -0.00615 | 0.001517 | 1        | 3.63E-05 |
| ss715579007     | 0.003535 | 0.001199 | 1        | 0.00025  | ss715590471     | -0.00558 | 0.001448 | 1        | 3.1E-05  |
| ss715609664     | 0.003281 | 0.001464 | 1        | 8.63E-06 | ss715598227     | -0.00557 | 0.005702 | 1        | 1.89E-05 |
| ss715625697     | 0.003213 | 0.000729 | 1        | 1.09E-06 | ss715632123     | -0.00539 | 0.0025   | 1        | 0        |
| ss715586600     | 0.003188 | 0.000131 | 1        | 4.18E-05 | ss715607399     | -0.0051  | 0.001592 | 1        | 1.01E-05 |

This table shows the top 20 features with higher importance in both the positive side and negative side from permutation analysis.

\*rs# refers to Reference SNP cluster ID

Weight indicates the feature importance weight of SNP by permutation analysis

\*\* std refers to Standard Deviation

Score indicates the score of each feature by Random Forest score analysis

P-value is calculated by the GAPIT software

## Figures and Figure legends

### **Fig. 1. Manhattan plots of genome-wide association studies (GWAS) for soybean branching**

Manhattan plots of genome-wide association studies (GWAS) for soybean branching measured with the mixed linear model (MLM). The X-axis is the genomic position of the SNPs in each linkage group, and the Y-axis is the negative log base 10 of the P-values. Each chromosome is colored differently. SNPs with stronger associations with the trait will have a larger Y-coordinate value. The general and highly significant trait-associated SNPs are distinguished by the green threshold lines. Genetic markers are positioned by their chromosomes and ordered by their base-pair positions. Genetic markers on adjacent chromosomes are displayed with different colors. The strength of the association signal is displayed in two ways. One indicator of strength is the height on the vertical axis for  $-\log P$ -values; the greater the height, the stronger the association. The other indicator is the degree of filling in the dots; the greater the area filled within the dot, the stronger the association.

## Fig. 2. The summary chart of feature importance analysis

This shows a summary of feature importance analysis by the different methods. Blue circle refers to the SNPs with P-value less than 1 identified by GAPIT software; and a total of 3450 SNPs were identified. Green circle refers to the 974 SNPs with positive weight and 1124 SNPs with negative weight, identified by permutation importance analysis. Red circle refers the 36077 SNPs, identified by Random Forest score (score  $\geq 1E-04$ ). The numbers inside the intersection refers to the SNPs, confirmed by both methods. 2800 SNPs were identified by Random Forest score analysis, with P-value less than 1. A total of 1770 SNPs (with 806 SNPs with positive weight and 964 SNPs with negative weight) were confirmed by both of Random Forest score analysis and permutation analysis (highlighted in yellow). 86 SNPs with positive weight and 86 SNPs with negative weight were identified by permutation analysis, with P-value less than 1. The 69 SNPs with positive weight and 76 SNPs with negative weight were confirmed by both of Random Forest score analysis and permutation analysis, with P-value less than 1 (highlighted in yellow).

### **Fig. 3. Biological Process Classification**

This shows the biological process classification based on GO enrichment analysis. There are 66 genes were classified into 16 GO classes, they are GO:0009908 (Flower Development), GO:0005975(Carbohydrate Metabolic Process), GO:0006412(Translation), GO:0006629 (Lipid Metabolic Process), GO:0006950(Response To Stress), GO:0007165(Signal Transduction), GO:0009058(Biosynthetic Process), GO:0006464 (Protein Modification Process), GO:0009790 (Embryo Development), GO:0009791 (Post-embryonic Development), GO:0040007 (Growth), GO:0009628 (Response To Abiotic Stimulus), GO:0007275 (Multicellular Organismal Development), GO:0006810(Transport), GO:0015979 (Photosynthesis), GO:0006139 (Nucleobase, Nucleoside, Nucleotide And Nucleic Acid Metabolic Process) and there are 14 genes uncategorized. The corresponding gene number is showed in brackets.



#### **Fig. 4. Cellular Component Classification**

This shows the cellular component classification based on GO enrichment analysis. There are 388 genes were classified into 18 GO classes, they are GO:0005634(nucleus), GO:0005739(mitochondrion), GO:0005829(cytosol), GO:0005886(plasma membrane), GO:0005737(cytoplasm), GO:0005794(Golgi apparatus), GO:0005773(vacuole), GO:0016020(membrane), GO:0005576(extracellular region), GO:0009536(plastid), GO:0005618(cell wall), GO:0005777(peroxisome), GO:0005730(nucleolus), GO:0005622(intracellular), GO:0005840(ribosome), GO:0005783(endoplasmic reticulum), GO:0009579(thylakoid), GO:0005635(nuclear envelope) and 14 uncategorized. The corresponding gene number is showed in brackets.

### **Fig. 5. Molecular Function Classification**

This shows the molecular function classification based on GO enrichment analysis. There are 264 genes were classified into 17 GO classes, they are GO:0003677(DNA binding), GO:0003700(sequence-specific DNA binding transcription factor activity), GO:0000166(nucleotide binding), GO:0003824(catalytic activity), GO:0005215(transporter activity), GO:0016301(kinase activity), GO:0005488(binding), GO:0005515(protein binding), GO:0003723 (RNA binding), GO:0019825(oxygen binding), GO:0016787(hydrolase activity), GO:0016740(transferase activity), GO:0030246(carbohydrate binding), GO:0004872(receptor activity), GO:0005198(structural molecule activity), GO:0004871 (signal transducer activity) and 14 uncategorized. The corresponding gene number is showed in brackets.

## **Fig. 6. Gene location map**

This shows the location of 328 genes, identified by our feature importance analysis. In soybase, there are 35 branching related genes were previously reported; For comparison, the 35 genes are also added to this map (marked by ▼). Color coding is used in the genome viewer to differentiate each query in a multiple FASTA submission. The height of the colored indicators is proportional to the number of BLAST hits in that genomic bin.

Seven Additional Files:

Sup\_Table1. GAPIT.MLM.Branching.GWAS.Results.csv

Sup\_Table2. RF\_Perm\_importance.xlsx

Sup\_Table3. RF\_feature\_score.xlsx

Sup\_Table4. gene Blast result.xls

Sup\_Table5. gene ontology analysis.xlsx

Sup\_Table6. gene\_expression information.csv

Sup\_Table7. RS\_HeaderT.csv

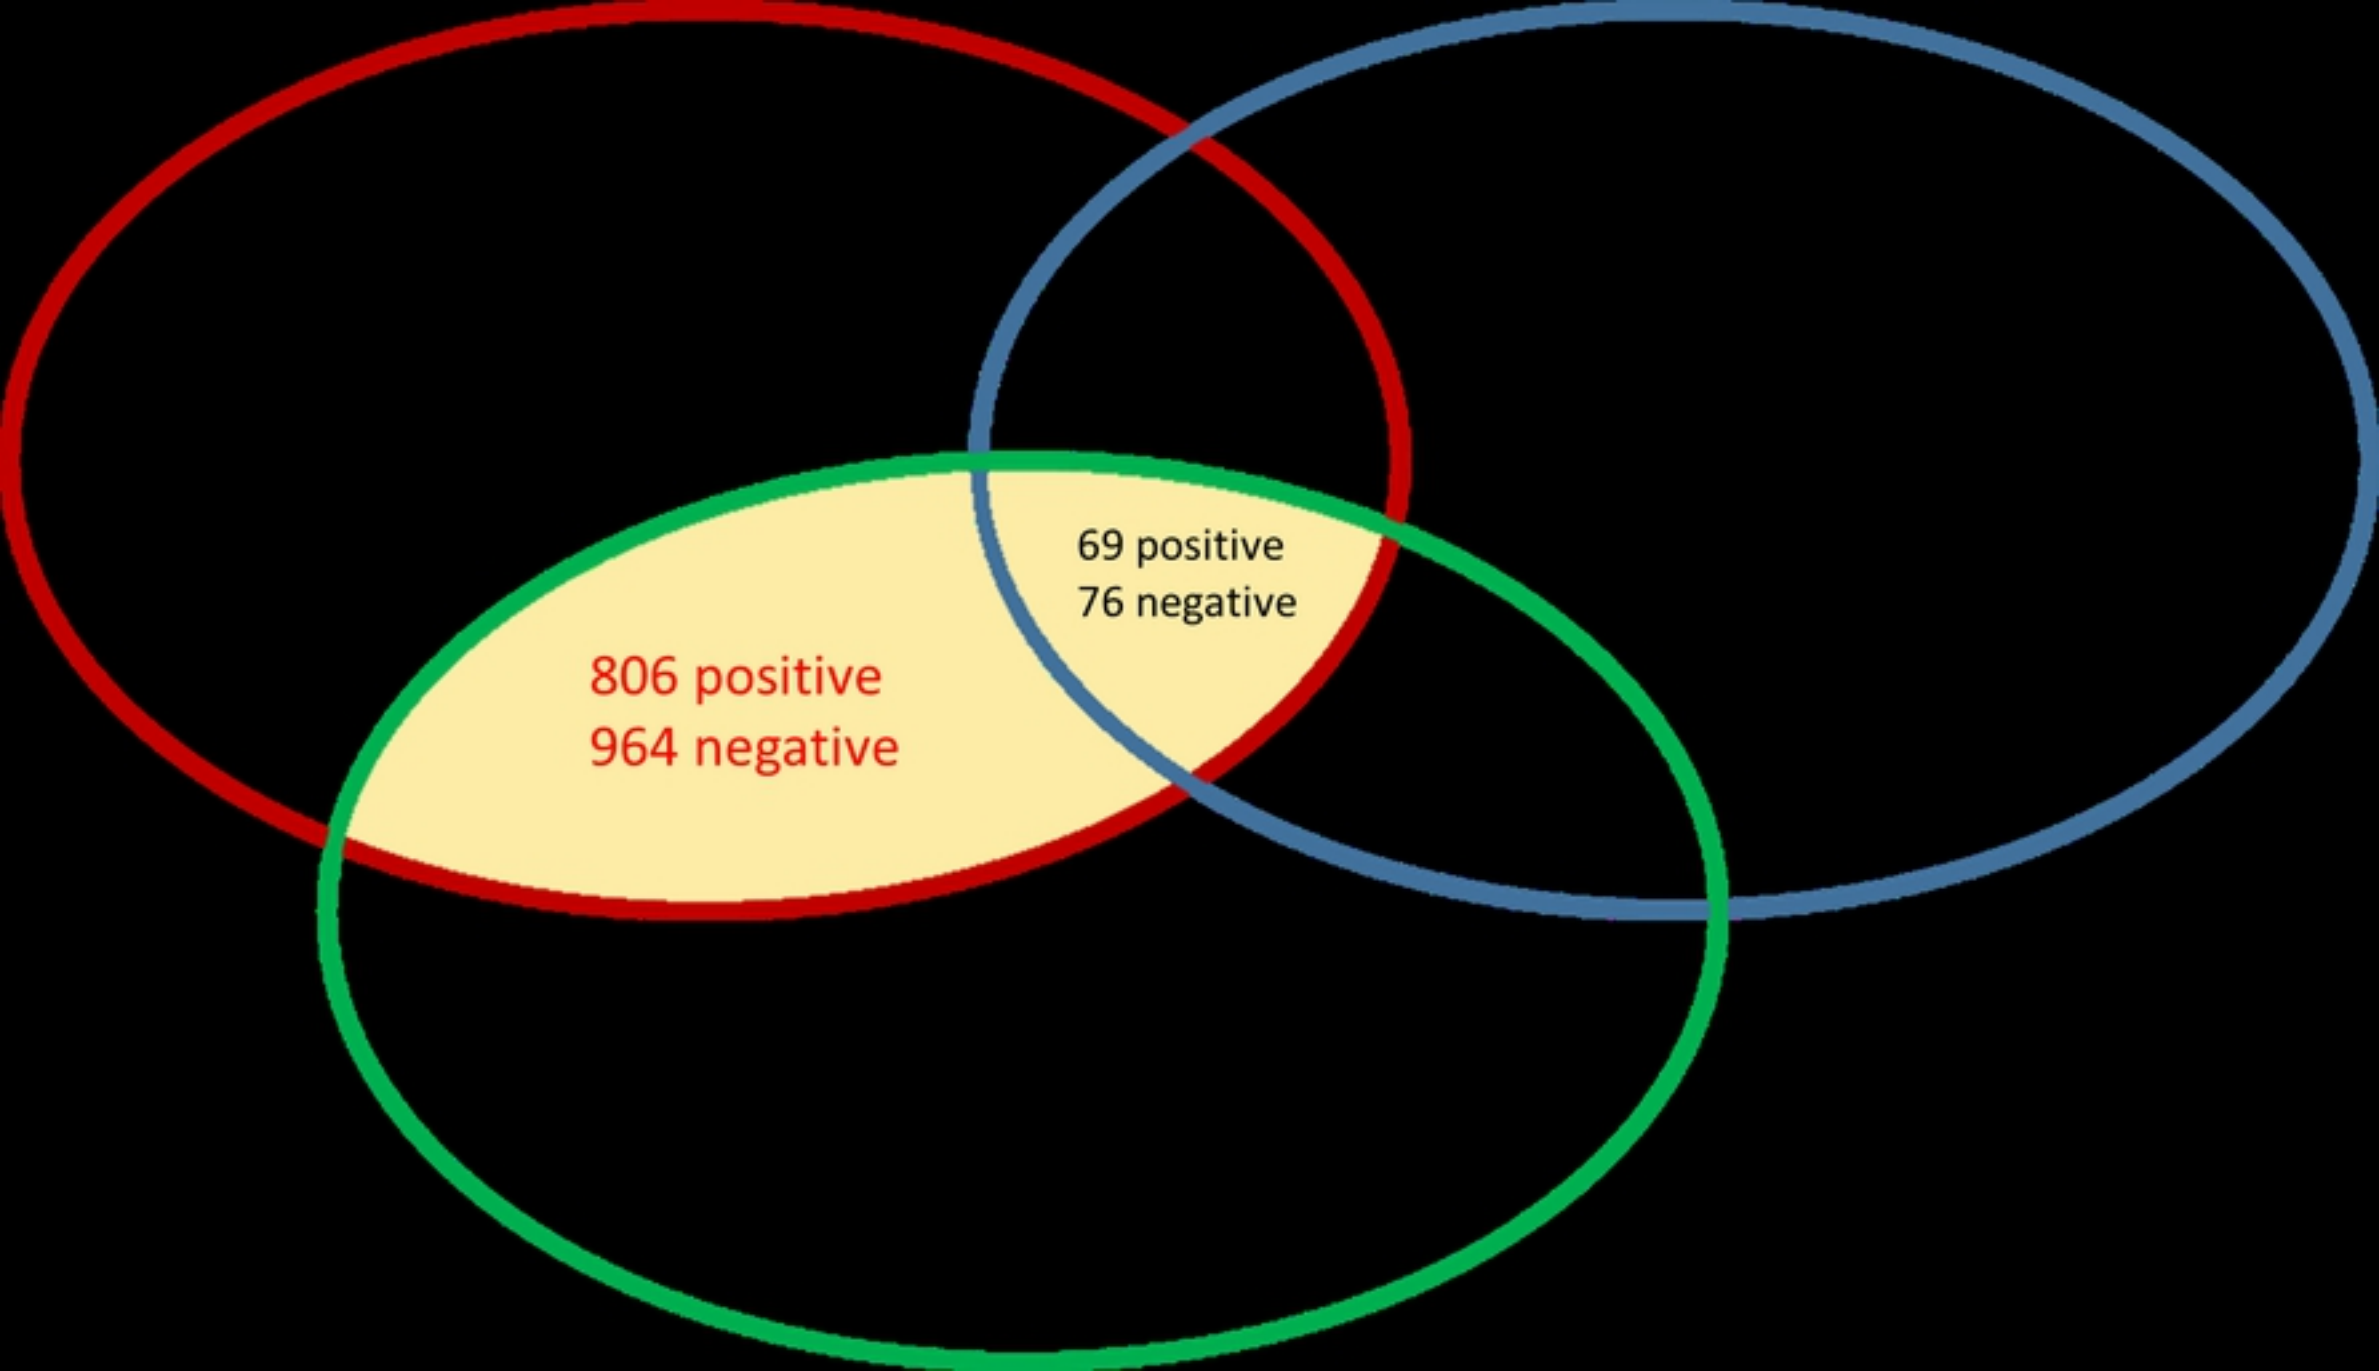

69 positive  
76 negative

806 positive  
964 negative

# Biological Process

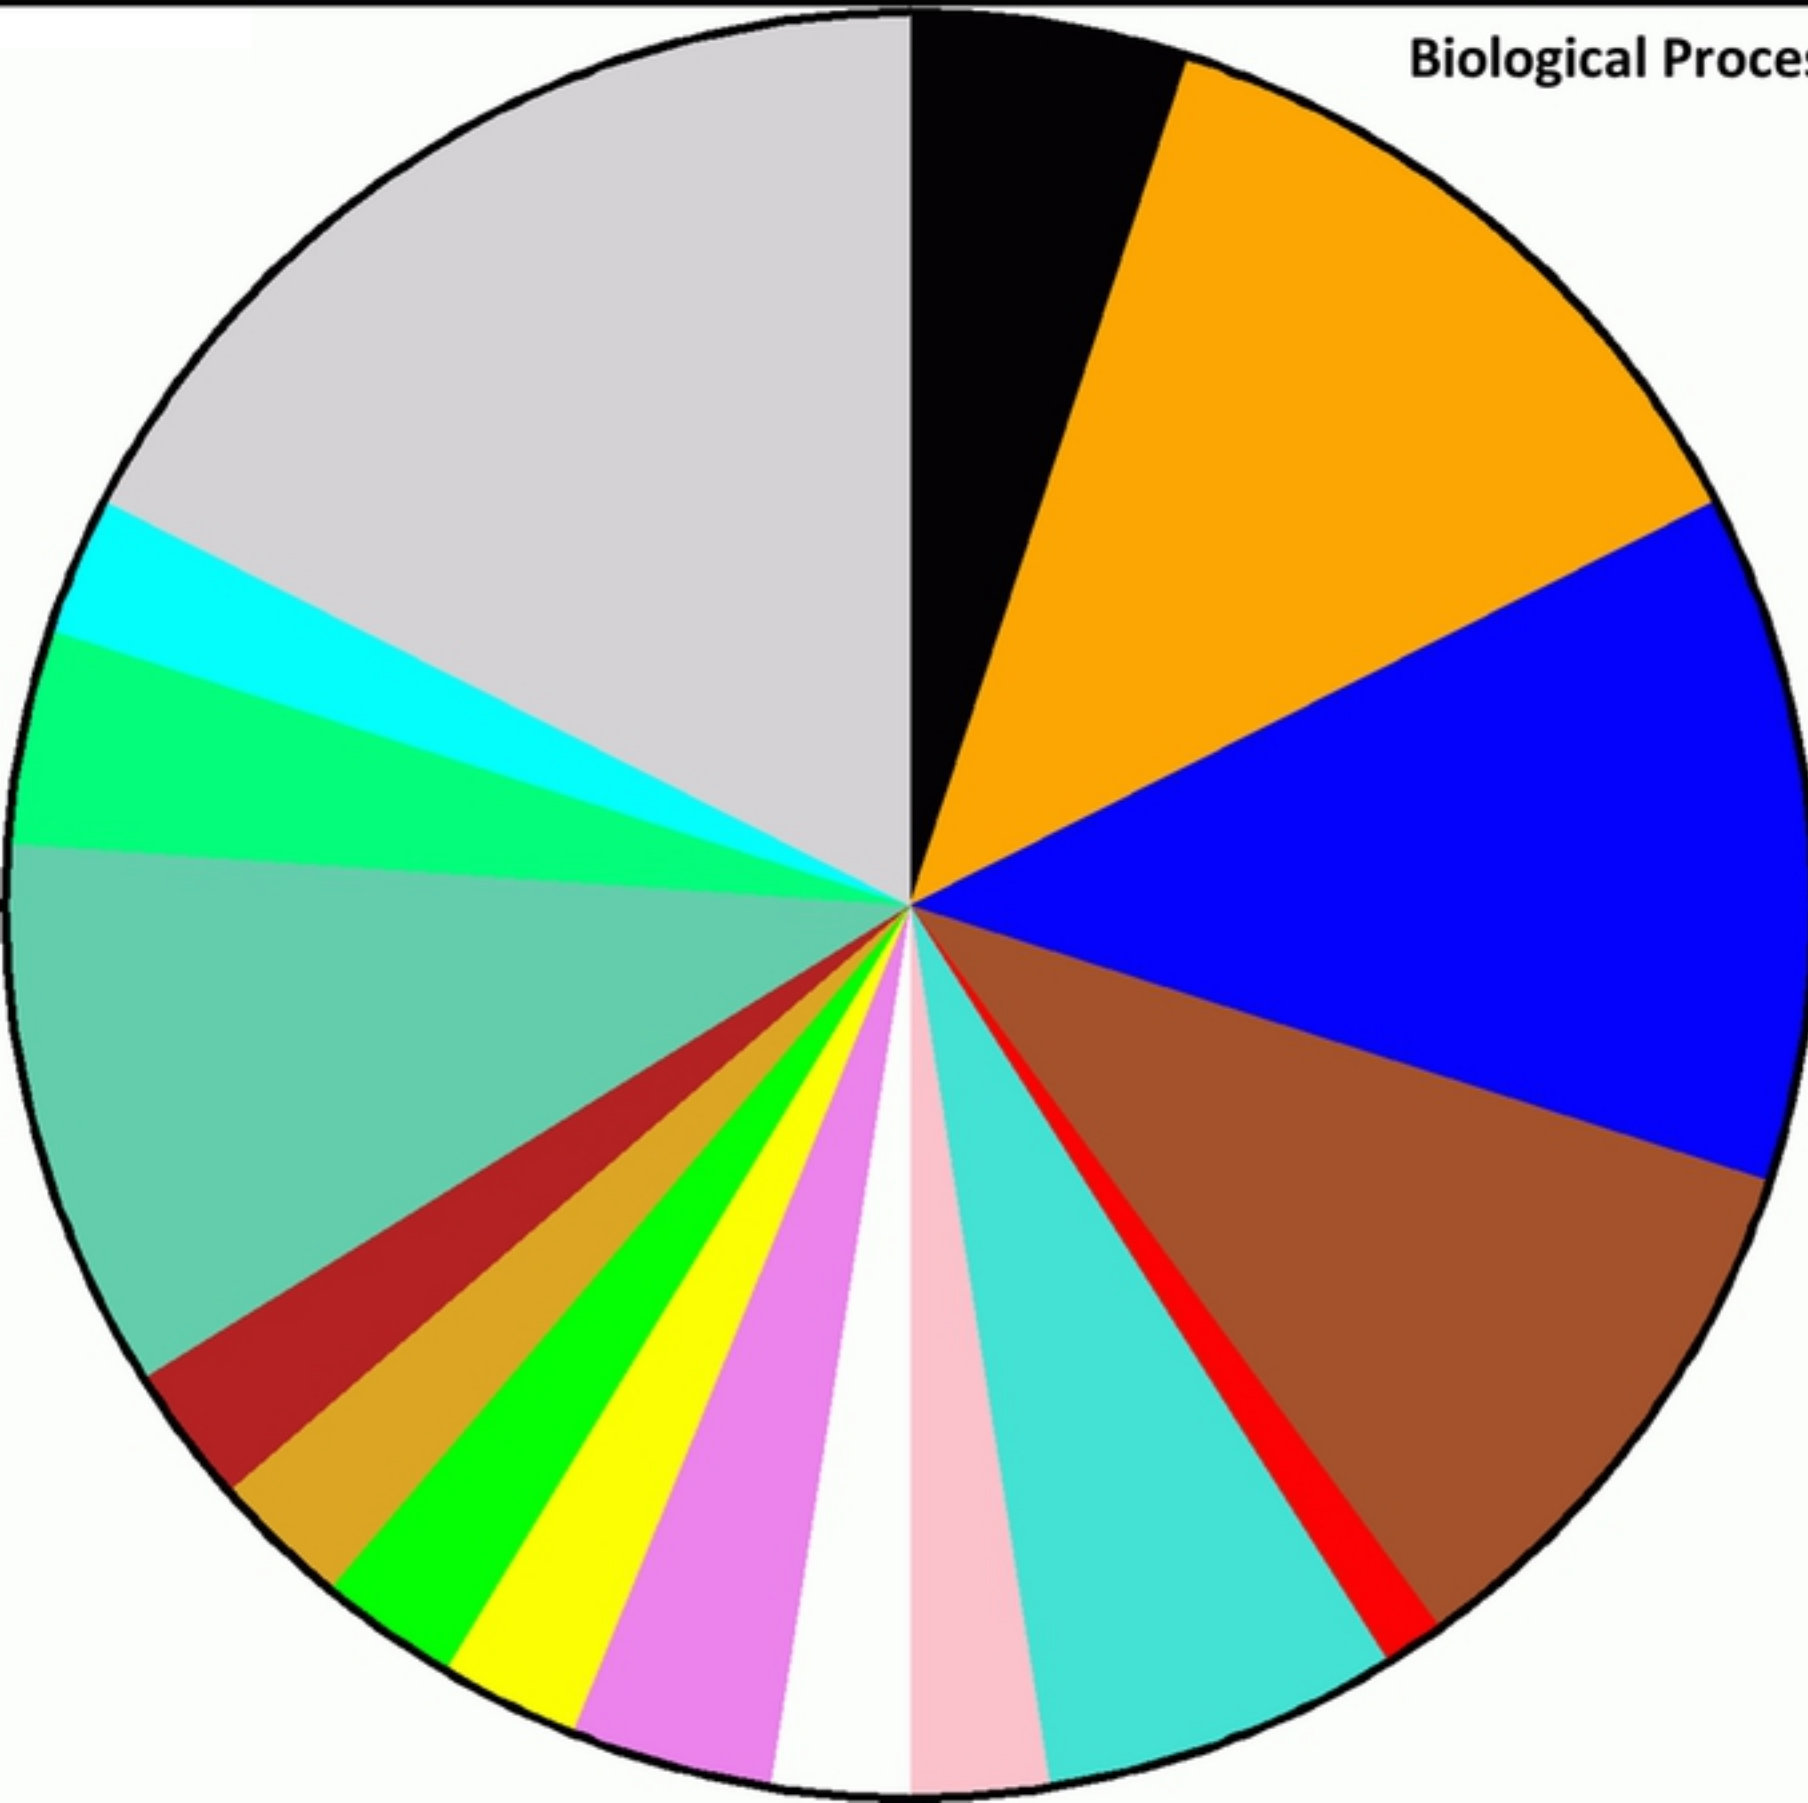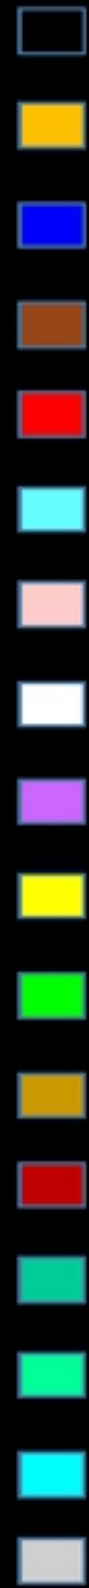

Cellular Component

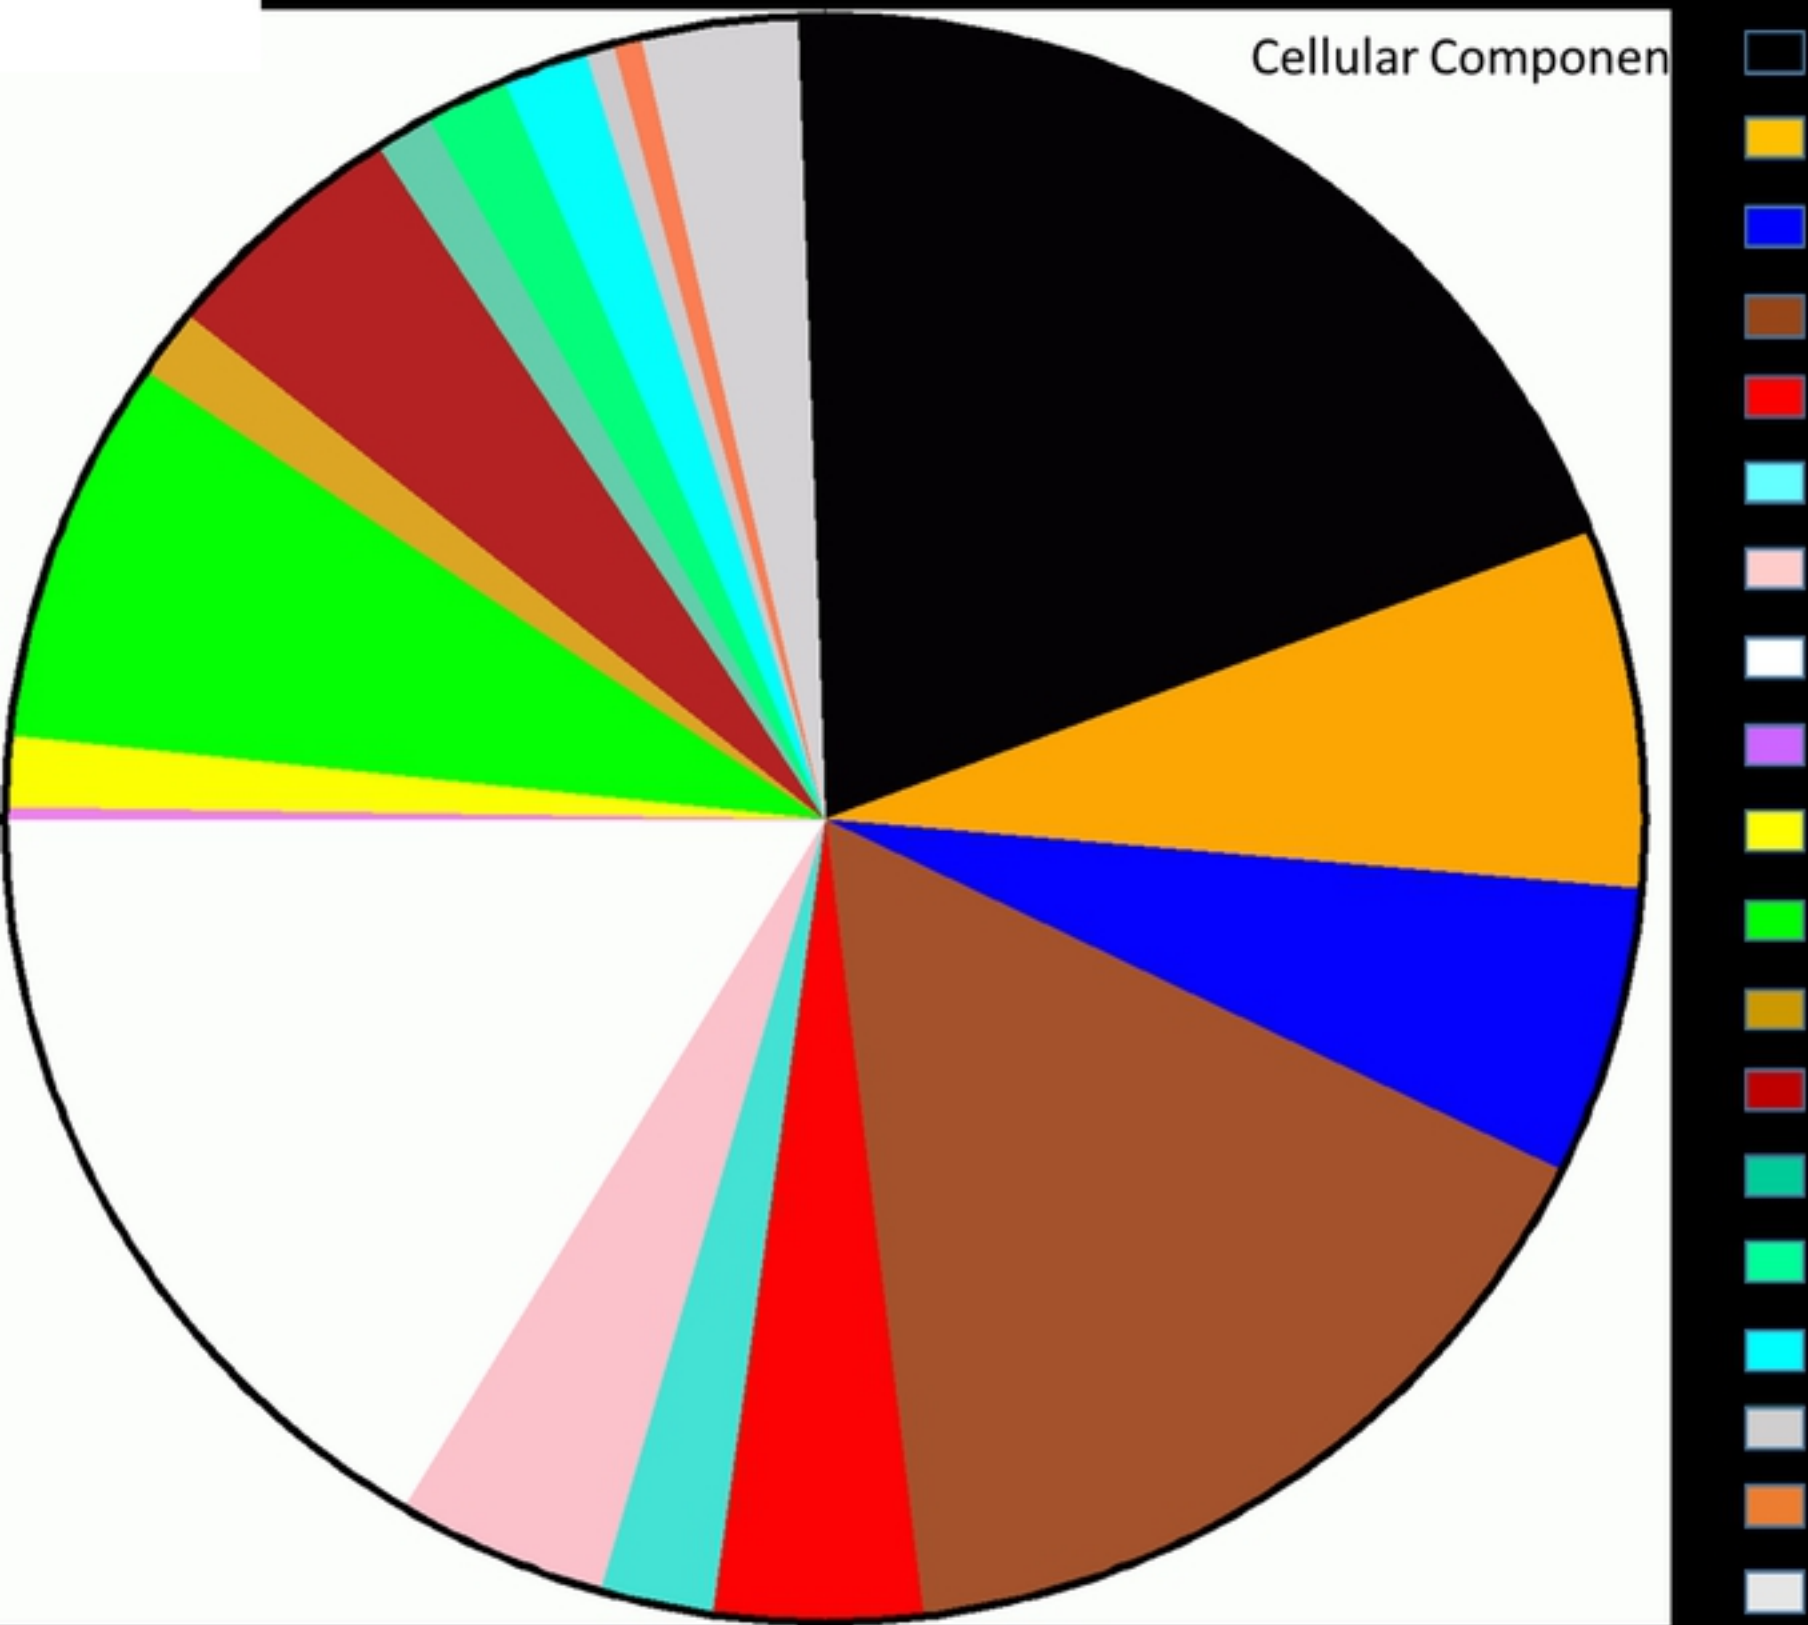

# Molecular Function

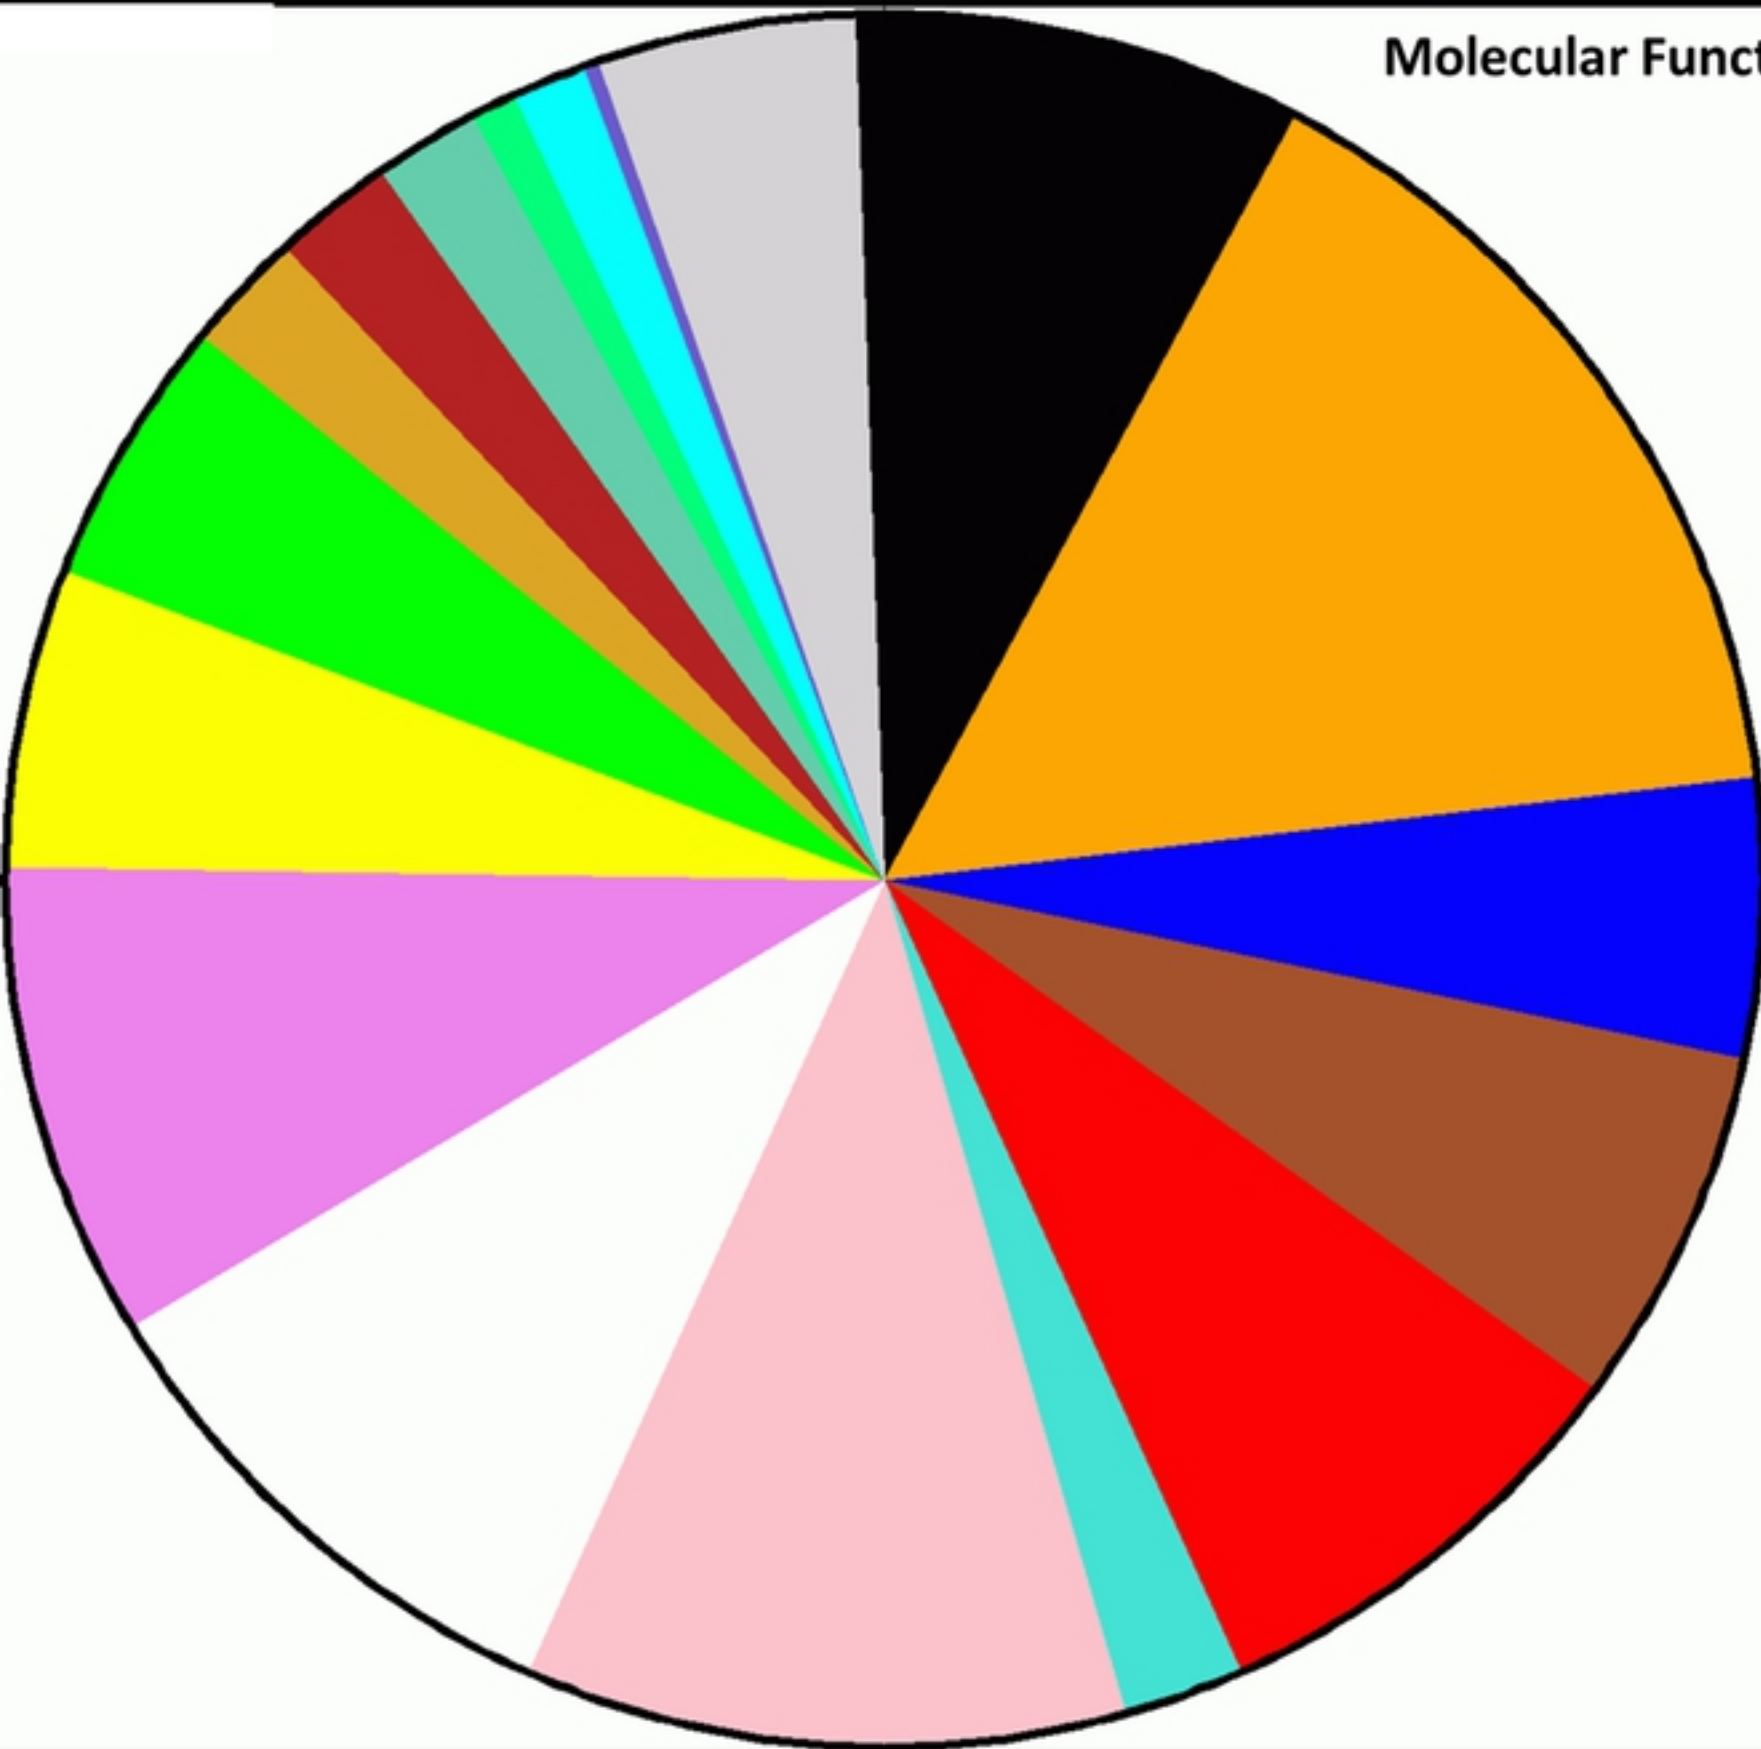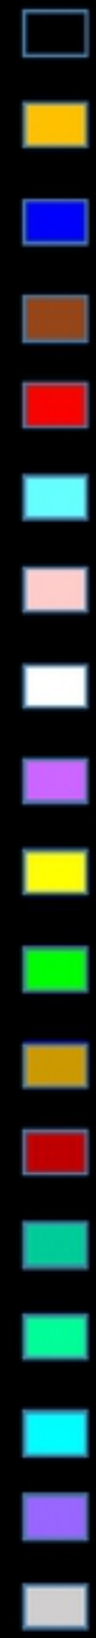



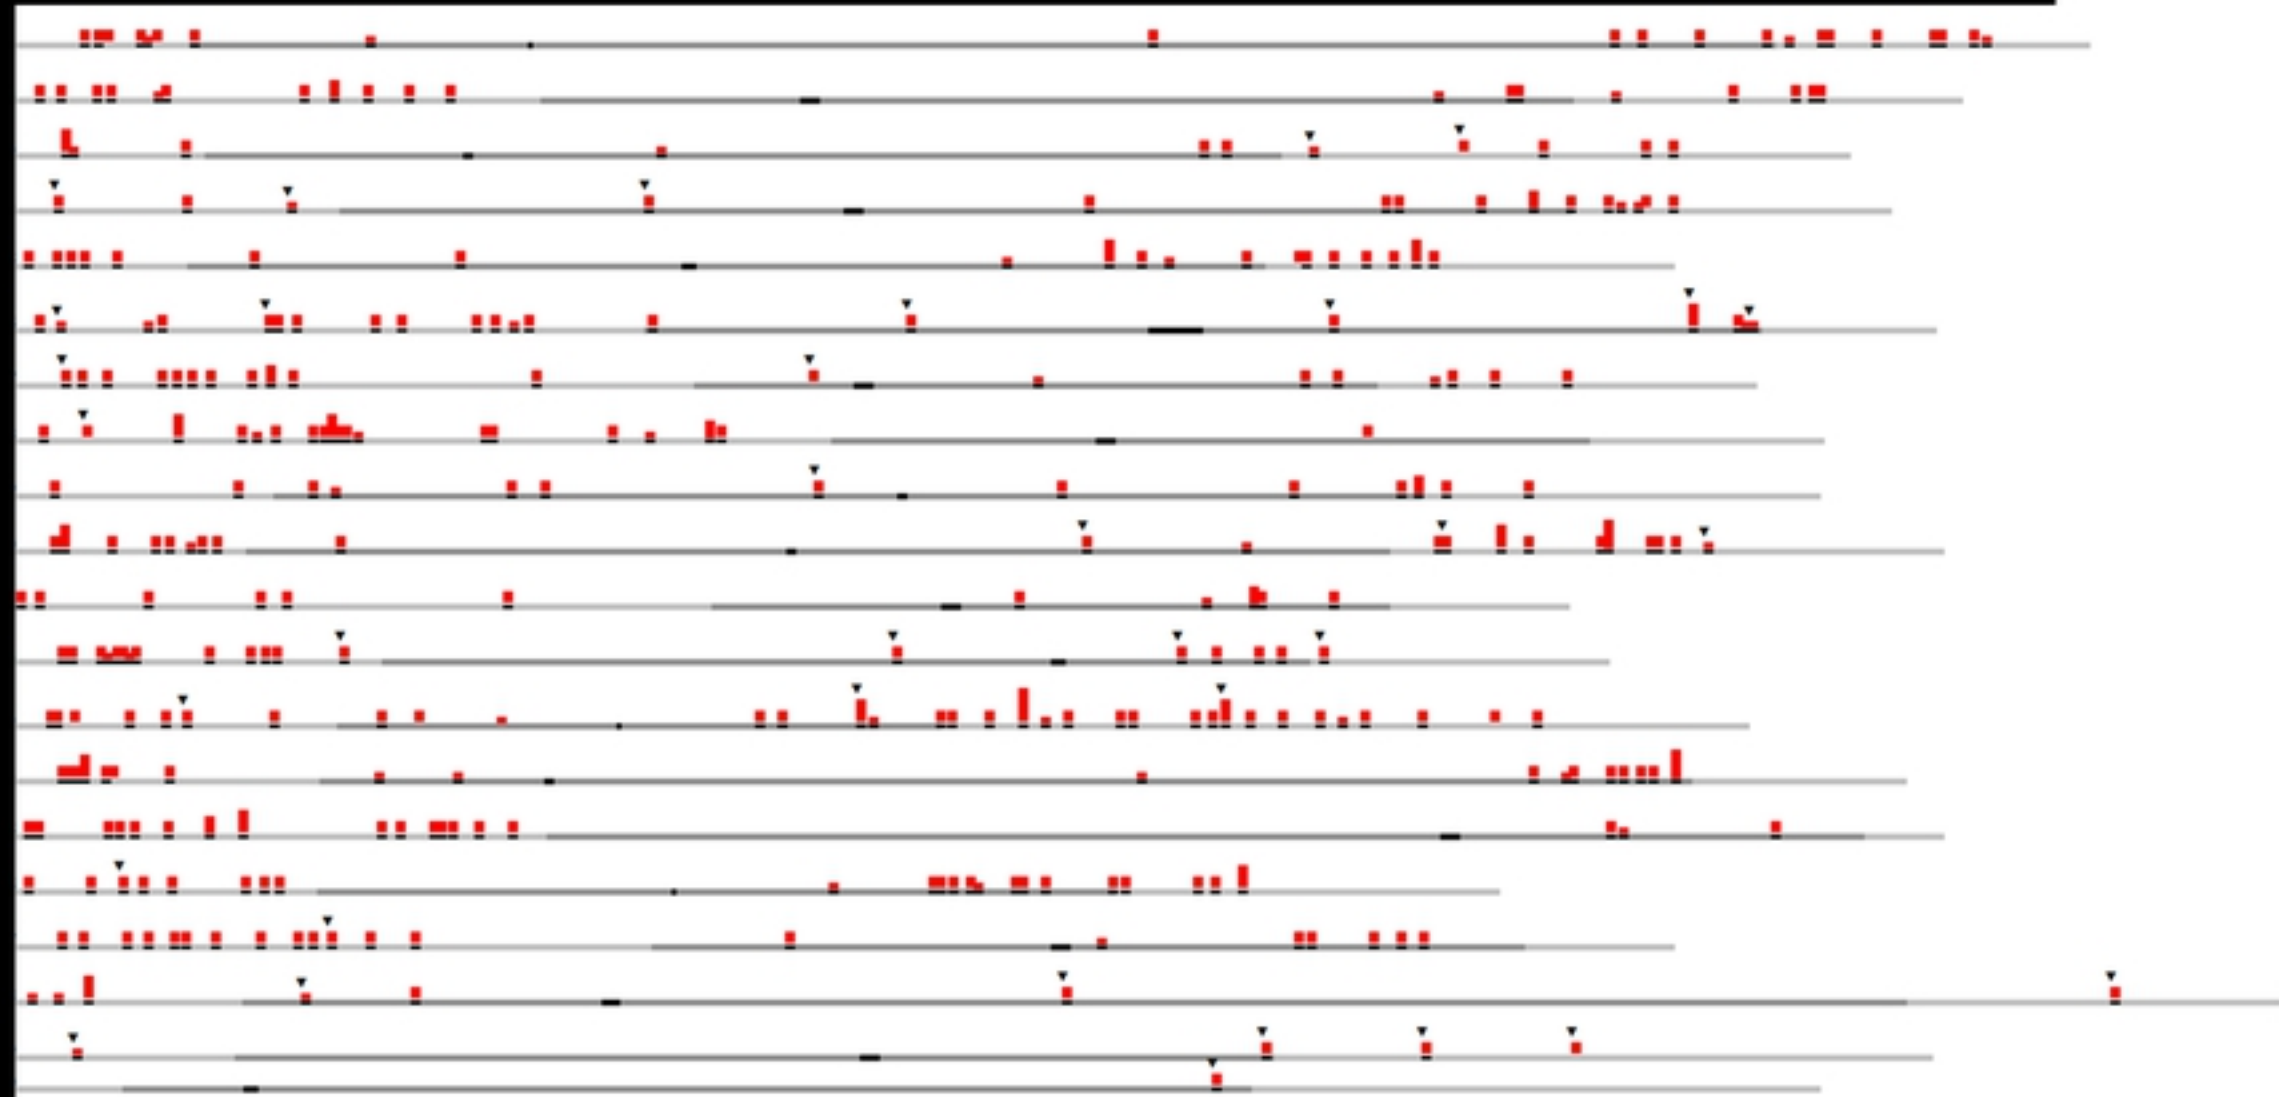

# MLM.Branching

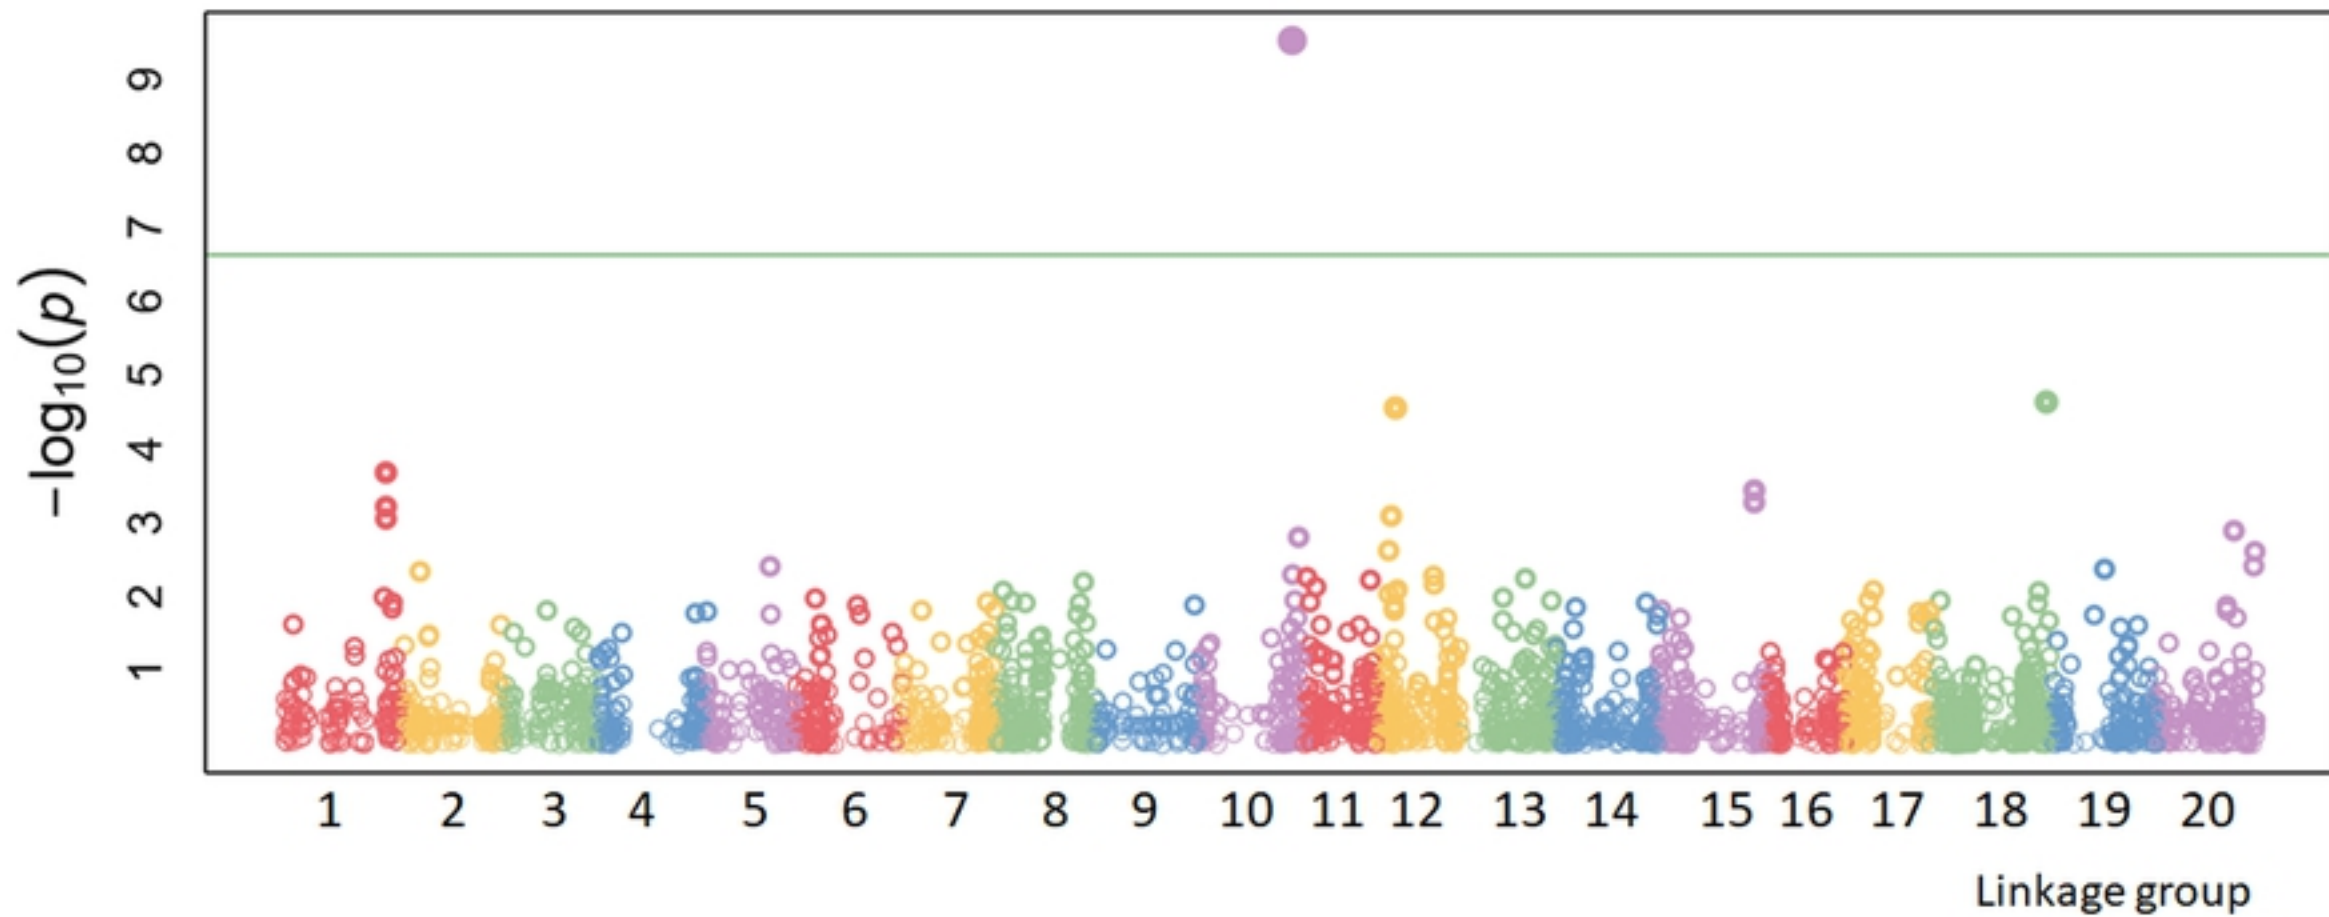

Source: https://www.biorxiv.org/content/10.1101/712190v1.full.pdf
